# Supplementary material
Source: PubMed Central journal article supplement (PMC4534071)
Supplement: supp_WNL.0000000000001806_Tables_e-1-3.pdf [file supp_WNL.0000000000001806_Tables_e-1-3.pdf]

**Table e-1** Motor evoked potential amplitudes (mV) before and after PAS

|                  | Baseline    | T0          | T30          | T60          |
|------------------|-------------|-------------|--------------|--------------|
| <b>APB</b>       |             |             |              |              |
| Controls         | 1.01 ± 0.05 | 1.26 ± 0.18 | 1.68 ± 0.20* | 1.75 ± 0.29* |
| Med-OFF/Stim-OFF | 1.14 ± 0.12 | 1.02 ± 0.09 | 1.12 ± 0.13  | 1.16 ± 0.12  |
| Med-OFF/Stim-ON  | 1.02 ± 0.09 | 1.17 ± 0.21 | 1.20 ± 0.28  | 1.17 ± 0.21  |
| Med-ON/Stim-OFF  | 0.98 ± 0.14 | 1.30 ± 0.24 | 1.07 ± 0.15  | 0.90 ± 0.16  |
| Med-ON/Stim-ON   | 0.95 ± 0.09 | 1.27 ± 0.11 | 1.45 ± 0.20* | 1.47 ± 0.20* |
| <b>ADM</b>       |             |             |              |              |
| Controls         | 0.89 ± 0.18 | 1.10 ± 0.10 | 1.16 ± 0.11  | 1.11 ± 0.19  |
| Med-OFF/Stim-OFF | 1.69 ± 0.32 | 1.99 ± 0.55 | 1.58 ± 0.37  | 1.80 ± 0.41  |
| Med-OFF/Stim-ON  | 1.81 ± 0.41 | 1.56 ± 0.43 | 1.95 ± 0.53  | 1.87 ± 0.49  |
| Med-ON/Stim-OFF  | 1.49 ± 0.32 | 1.66 ± 0.45 | 1.91 ± 0.56  | 1.65 ± 0.53  |
| Med-ON/Stim-ON   | 1.22 ± 0.24 | 1.71 ± 0.26 | 1.64 ± 0.27  | 1.99 ± 0.50  |

\* $P < 0.05$  by post hoc test compared with baseline. Values are mean ± standard error of the mean. Med-OFF/Stim-OFF = medication off/stimulation off; Med-OFF/Stim-ON = medication off/stimulation on; Med-ON/Stim-OFF = medication on/stimulation off; Med-ON/Stim-ON = medication on/stimulation on.

**Table e-2** Cortical silent period durations (ms) before and after PAS

|                  | Baseline     | T0            | T30          | T60          |
|------------------|--------------|---------------|--------------|--------------|
| <b>APB</b>       |              |               |              |              |
| Controls         | 157.4 ± 12.5 | 178.5 ± 12.9* | 175.8 ± 13.5 | 171.1 ± 12.7 |
| Med-OFF/Stim-OFF | 143.8 ± 7.4  | 150.5 ± 7.3   | 139.8 ± 8.3  | 144.0 ± 7.5  |
| Med-OFF/Stim-ON  | 132.3 ± 9.8  | 131.7 ± 9.5   | 137.8 ± 9.1  | 139.5 ± 8.5  |
| Med-ON/Stim-OFF  | 147.5 ± 7.1  | 151.7 ± 7.9   | 147.0 ± 9.8  | 152.1 ± 10.2 |
| Med-ON/Stim-ON   | 146.7 ± 7.9  | 146.4 ± 8.5   | 148.7 ± 8.5  | 142.2 ± 9.7  |
| <b>ADM</b>       |              |               |              |              |
| Controls         | 157.1 ± 10.7 | 169.4 ± 11.3  | 171.3 ± 10.4 | 165.9 ± 9.1  |
| Med-OFF/Stim-OFF | 149.1 ± 8.5  | 145.5 ± 7.6   | 143.3 ± 9.0  | 152.3 ± 6.8  |
| Med-OFF/Stim-ON  | 140.7 ± 8.1  | 138.1 ± 8.8   | 138.3 ± 9.8  | 138.5 ± 9.3  |
| Med-ON/Stim-OFF  | 145.1 ± 10.3 | 145.9 ± 8.9   | 145.1 ± 12.8 | 139.2 ± 11.5 |
| Med-ON/Stim-ON   | 143.6 ± 11.3 | 143.8 ± 11.3  | 146.7 ± 9.6  | 144.8 ± 11.5 |

\* $P < 0.05$  by post hoc test compared with baseline. Values are mean ± standard error of the mean. Med-OFF/Stim-OFF = medication off/stimulation off; Med-OFF/Stim-ON = medication off/stimulation on; Med-ON/Stim-OFF = medication on/stimulation off; Med-ON/Stim-ON = medication on/stimulation on.

**Table e-3** Background EMG area for 100ms and 200 ms preceding TMS pulse during MEP amplitudes and CSP duration recording respectively ( $\mu\text{V}\cdot\text{ms}$ )

|                  | APB-MEP         | ADM-MEP         | APB-CSP         | ADM-CSP         |
|------------------|-----------------|-----------------|-----------------|-----------------|
| Controls         | $0.60 \pm 0.02$ | $0.65 \pm 0.03$ | $5.06 \pm 0.10$ | $5.54 \pm 0.34$ |
| Med-OFF/Stim-OFF | $0.79 \pm 0.11$ | $0.51 \pm 0.03$ | $5.81 \pm 0.98$ | $6.97 \pm 0.69$ |
| Med-OFF/Stim-ON  | $0.53 \pm 0.05$ | $0.75 \pm 0.17$ | $4.66 \pm 0.29$ | $4.77 \pm 0.51$ |
| Med-ON/Stim-OFF  | $0.65 \pm 0.14$ | $0.87 \pm 0.25$ | $5.92 \pm 1.03$ | $3.96 \pm 0.45$ |
| Med-ON/Stim-ON   | $0.56 \pm 0.05$ | $0.83 \pm 0.12$ | $5.62 \pm 0.35$ | $6.45 \pm 0.88$ |

Values are mean  $\pm$  SEM. APB-MEP and ADM-MEP represent the resting state during measurement of MEP amplitudes. APB-CSP and ADM-CSP represent the active state during measurement of CSP duration.
